# Supplementary material for: Network Pharmacology-Based Antioxidant Effect Study of Zhi-Zi-Da-Huang Decoction for Alcoholic Liver Disease
Source: Hindawi journal article supplement (doi:10.1155/2015/492470), 2015-01-01
Supplement: f1 [file 492470.f1.pdf]

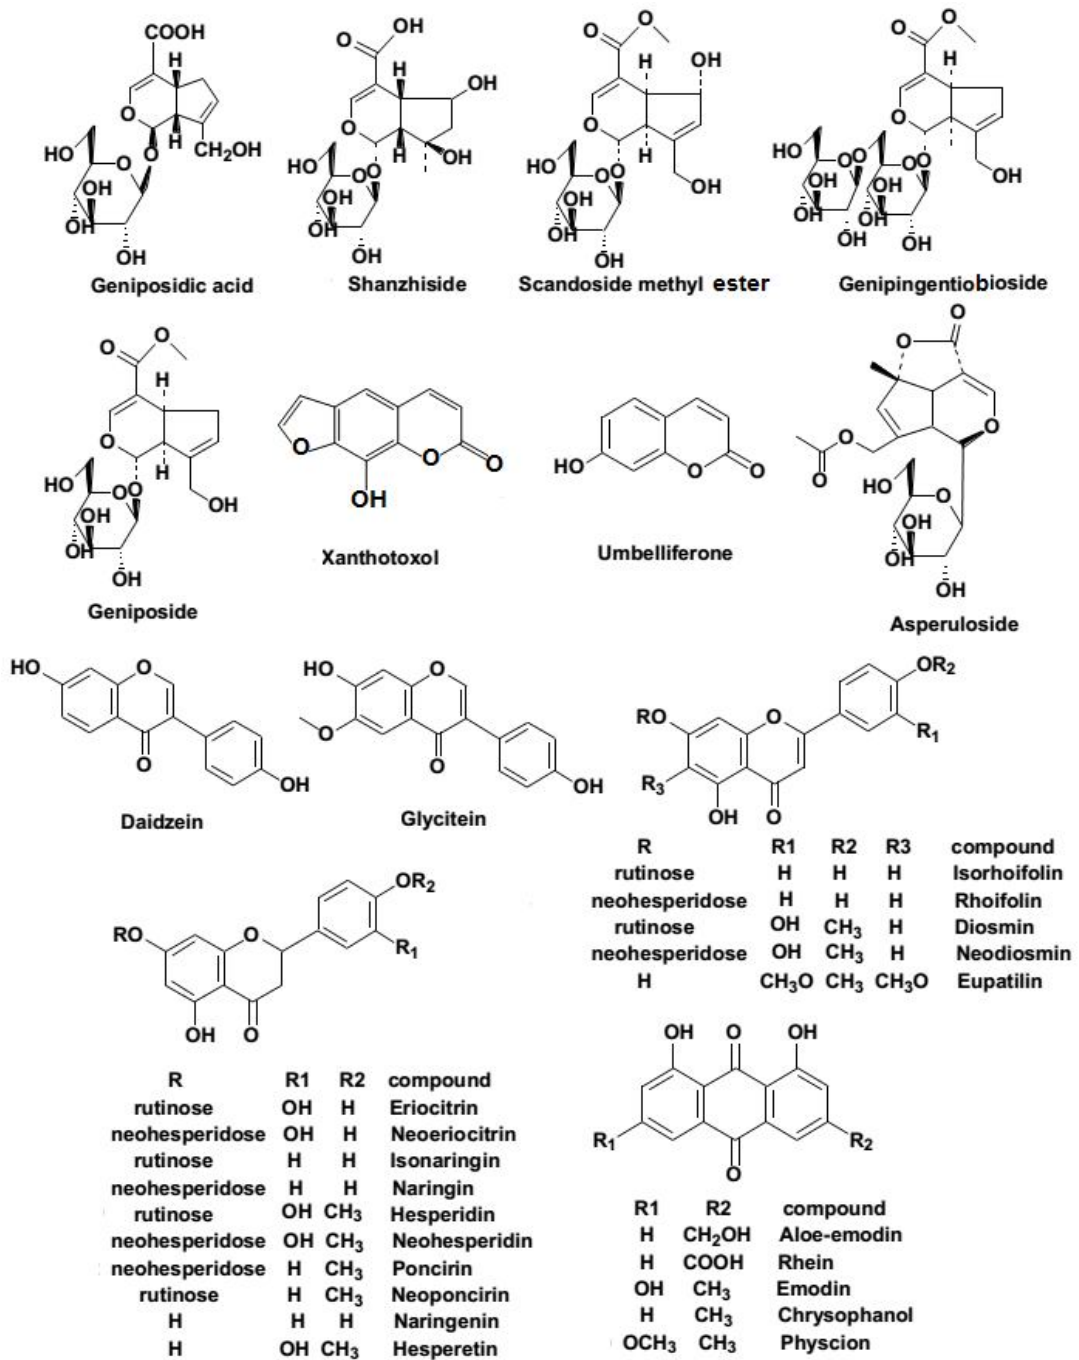

**Figure S1** Chemical structures of the thirty identified components by HPLC-PDA- ESI-MS/MS in Zhi-Zi-Da-Huang Decoction.
